# Supplementary material for: Temporal Changes in the Composition of Beached Holopelagic Sargassum spp. along the Northwestern Coast of Cuba
Source: MDPI journal article supplement (doi:10.3390/phycology3040027), 2023-09-22
Supplement: s1 [file s1]

Supplementary Table S1. Spatial variability of the holopelagic sargasso morphotypes biomass (Mean  $\pm$  SD) during the landings months (N= 13) for the surveyed beaches.

| Beach          | Morphotype             | Mean ( $\pm$ SD) biomass (wet kg m <sup>-2</sup> ) |
|----------------|------------------------|----------------------------------------------------|
| Cojímar        | <i>S. natans</i> I     | 1.57 $\pm$ 0.89                                    |
|                | <i>S. natans</i> VIII  | 0.73 $\pm$ 0.60                                    |
|                | <i>S. fluitans</i> III | 1.34 $\pm$ 0.79                                    |
| Bacuranao      | <i>S. natans</i> I     | 1.55 $\pm$ 0.83                                    |
|                | <i>S. natans</i> VIII  | 0.89 $\pm$ 0.75                                    |
|                | <i>S. fluitans</i> III | 1.38 $\pm$ 0.81                                    |
| Tarará         | <i>S. natans</i> I     | 2.15 $\pm$ 0.83                                    |
|                | <i>S. natans</i> VIII  | 1.33 $\pm$ 0.66                                    |
|                | <i>S. fluitans</i> III | 1.93 $\pm$ 0.81                                    |
| Mégano         | <i>S. natans</i> I     | 2.61 $\pm$ 0.91                                    |
|                | <i>S. natans</i> VIII  | 1.35 $\pm$ 0.65                                    |
|                | <i>S. fluitans</i> III | 1.87 $\pm$ 0.78                                    |
| Santa María    | <i>S. natans</i> I     | 2.93 $\pm$ 0.88                                    |
|                | <i>S. natans</i> VIII  | 1.39 $\pm$ 0.73                                    |
|                | <i>S. fluitans</i> III | 1.92 $\pm$ 0.85                                    |
| Paseo Marítimo | <i>S. natans</i> I     | 1.23 $\pm$ 0.92                                    |
|                | <i>S. natans</i> VIII  | 0.44 $\pm$ 0.56                                    |
|                | <i>S. fluitans</i> III | 0.79 $\pm$ 0.55                                    |
